# Supplementary material for: Phylogeny and circumscription of Dasyphyllum (Asteraceae: Barnadesioideae) based on molecular data with the recognition of a new genus, Archidasyphyllum
Source: PeerJ journal article supplement (doi:10.7717/peerj.6475), 2019-02-27
Supplement: Supplemental_Figure_S1.pdf [file Supplemental_Figure_S1.pdf]

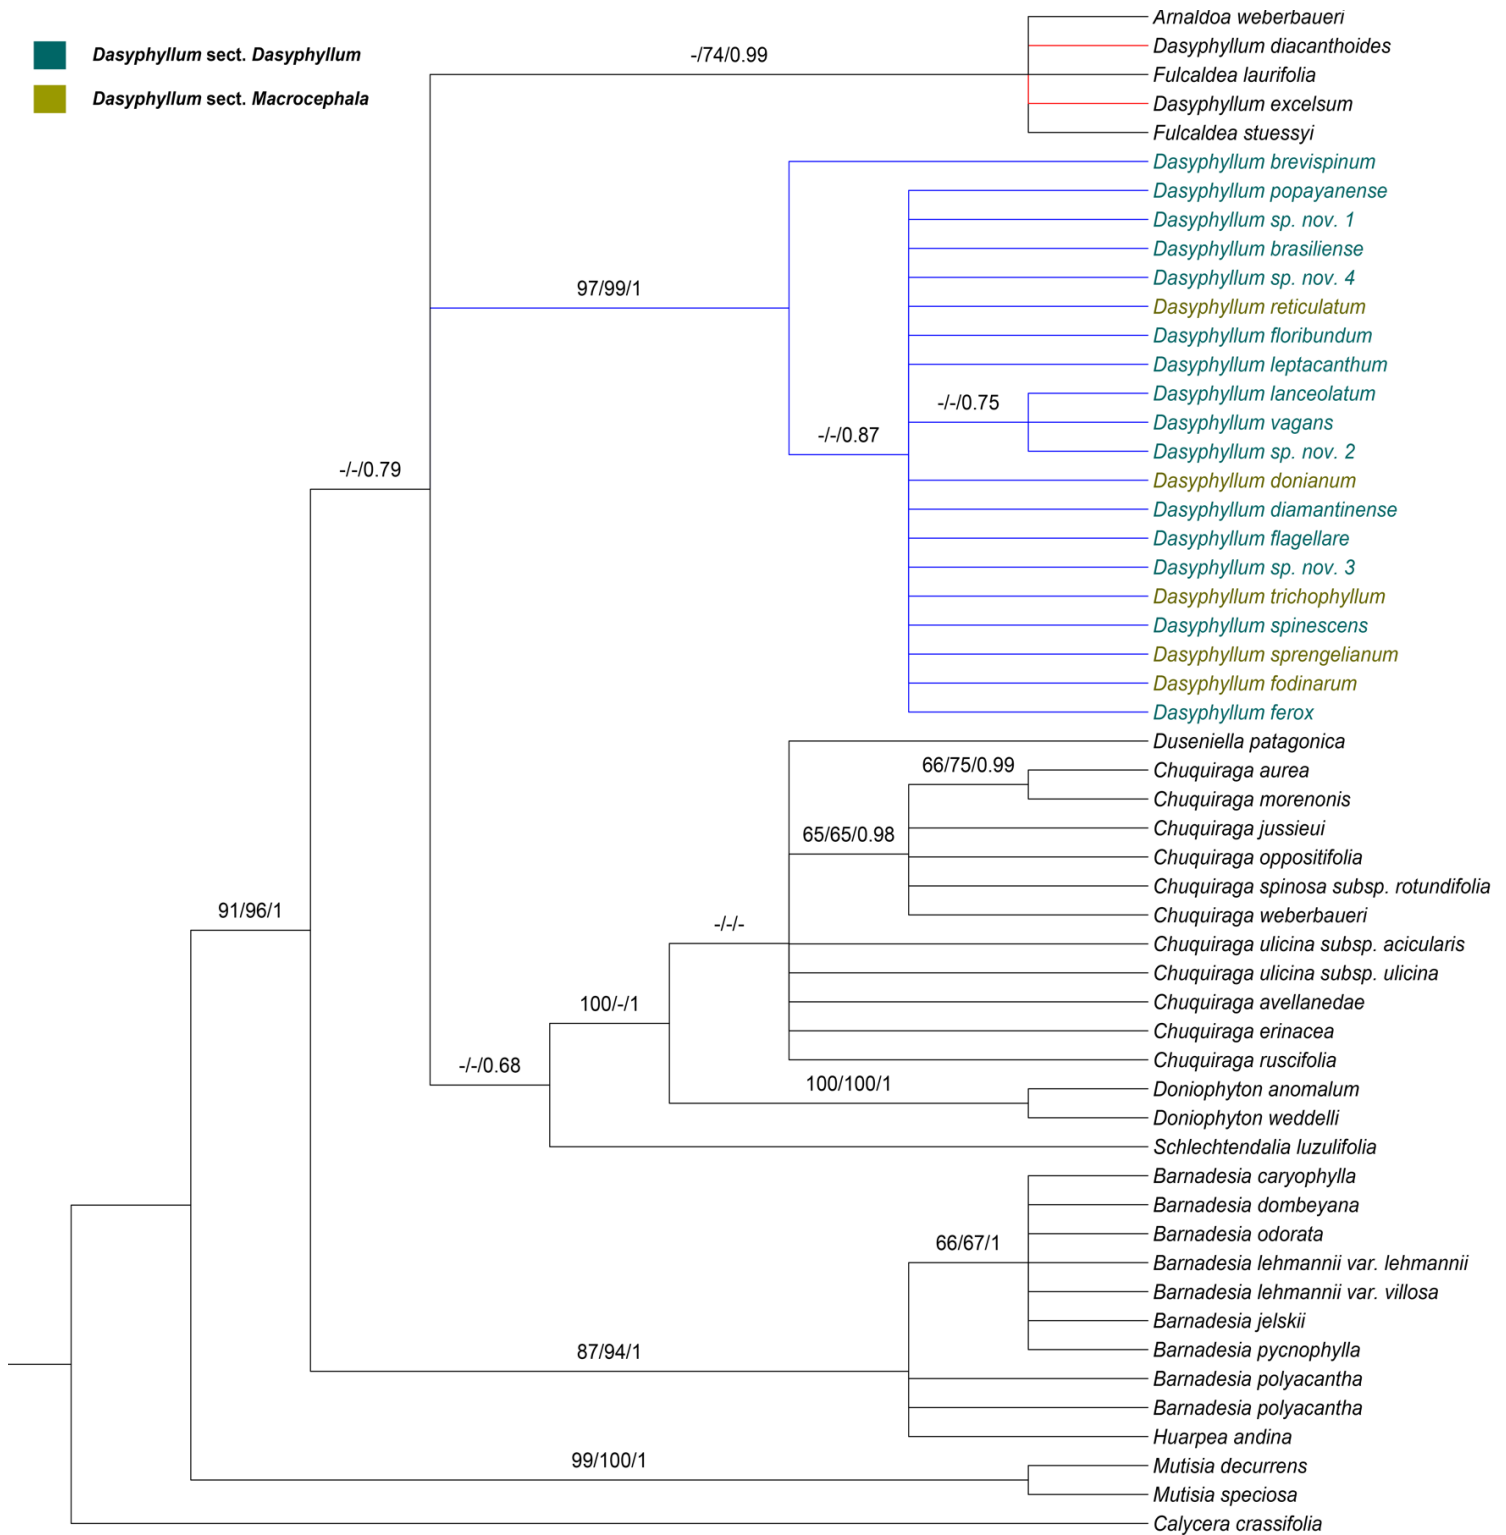

**Phylogenetic relationships of *Dasyphyllum* based on *trnL-trnF* marker inferred from Bayesian inference.** Support values are indicated above the branches in the order of parsimony, maximum likelihood, and Bayesian analyses. Support values lower than 63% are indicated by a dash (-).
